# Supplementary material for: Synthesis, coordination to Au(i) and photophysical properties of a novel polyfluorinated benzothiazolephosphine ligand
Source: Royal Society of Chemistry journal article supplement (doi:10.1039/b517728f), 2006-01-01
Supplement: b517728f.pdf [file b517728f.pdf]

# Synthesis, coordination to Au(I) and photophysical properties of a novel polyfluorinated benzothiazolephosphine ligand

Eduardo J. Fernández,<sup>\*a</sup> Antonio Laguna,<sup>\*b</sup> José M. López-de-Luzuriaga,<sup>a</sup> Miguel Monge,<sup>a</sup> Manuel Montiel,<sup>a</sup> M. Elena Olmos,<sup>a</sup> Javier Pérez<sup>a</sup> and María Rodríguez-Castillo<sup>a</sup>

<sup>a</sup> *Departamento de Química, Universidad de La Rioja, Grupo de Síntesis Química de La Rioja, UA-CSIC. Complejo Científico-Tecnológico, 26004-Logroño, SPAIN. E-mail: eduardo.fernandez@dq.unirioja.es*

<sup>b</sup> *Departamento de Química Inorgánica, Instituto de Ciencia de Materiales de Aragón, Universidad de Zaragoza-CSIC, 50009-Zaragoza, SPAIN. Fax: +34 976 761187; Tel: +34 976 761185; E-mail: alaguna@posta.unizar.es*

**ELECTRONIC SUPPLEMENTARY INFORMATION**

**Figure S1.** Control of the reaction between  $C_6F_5NCS$  and  $PPh_2H$  through  $^{31}P\{^1H\}$ ,  $^{19}F$  and  $^1H$  NMR.

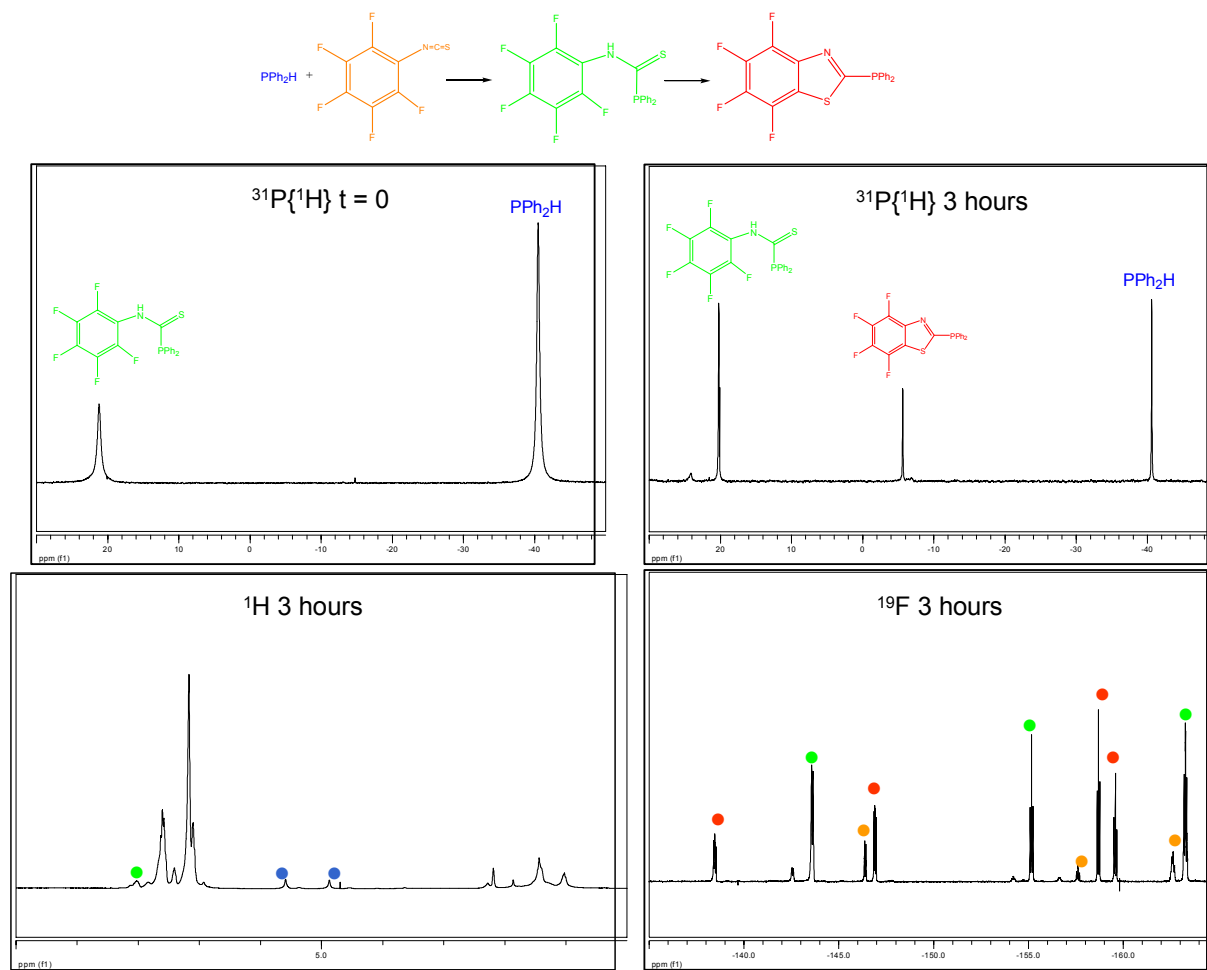

**Figure S2.** First few theoretical singlet excitations for model **1a** displaying the energy (nm) and oscillator strength

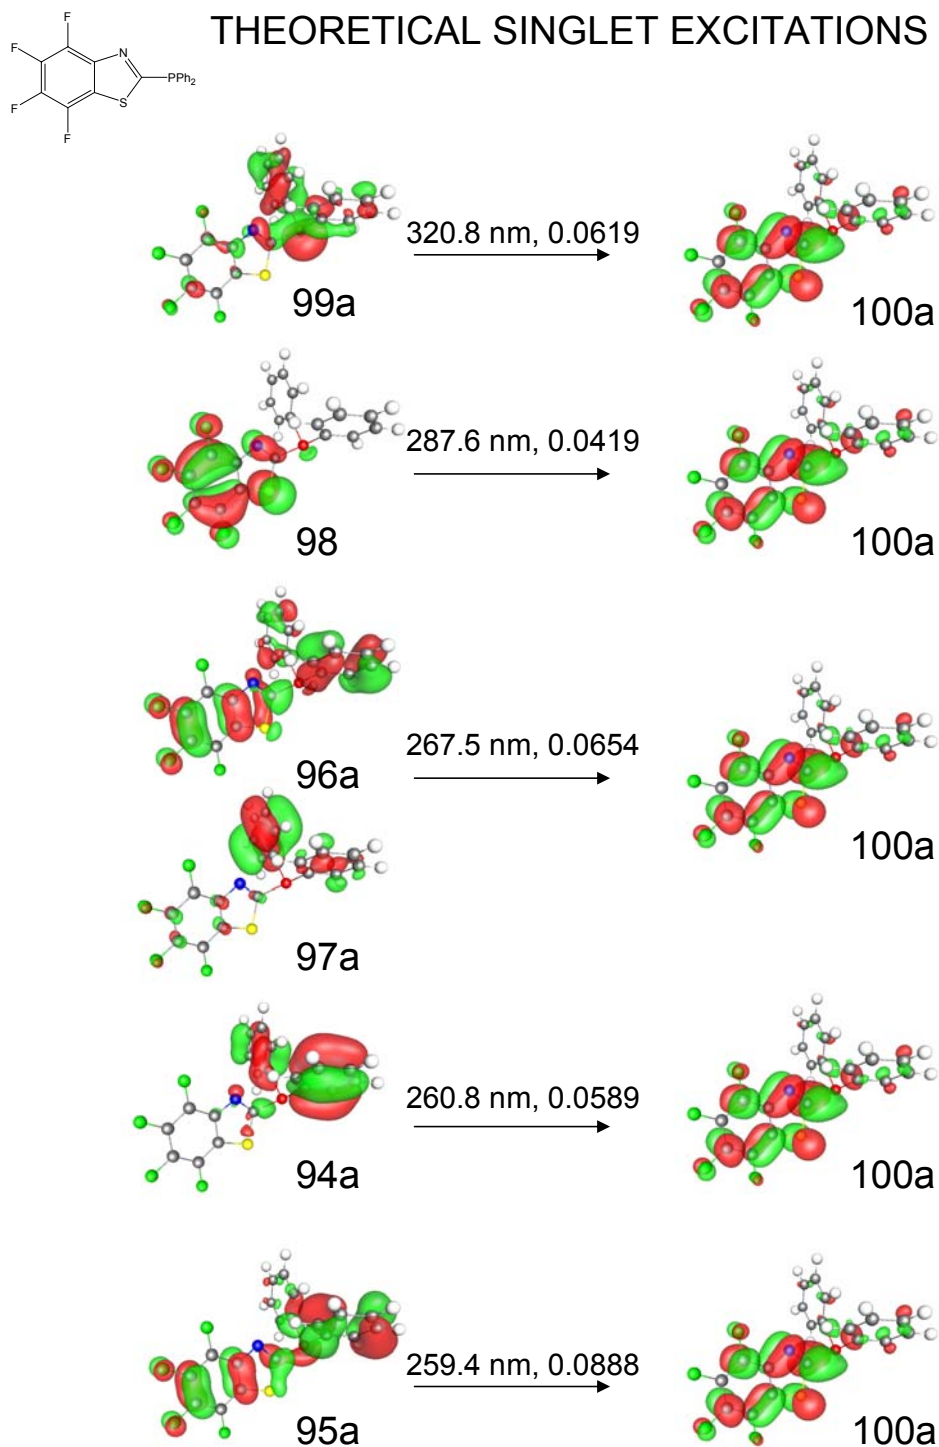

**Figure S3.** First few theoretical singlet excitations for model **3a** displaying the energy (nm) and oscillator strength

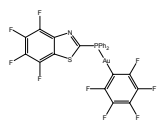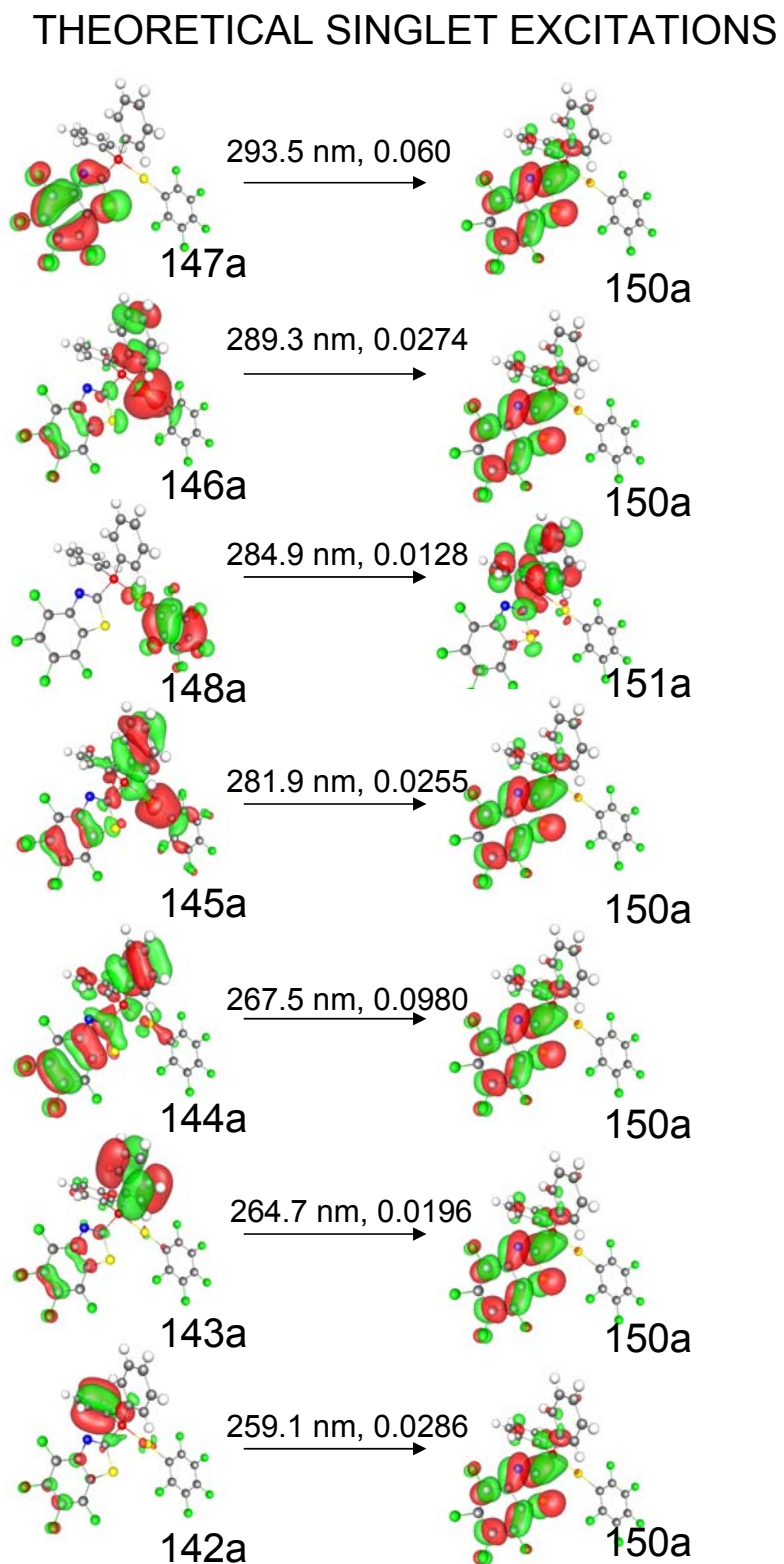

**Figure S4.** First theoretical triplet excitations for models **1a** and **3a** displaying the energy (nm).

### THEORETICAL TRIPLET EXCITATIONS

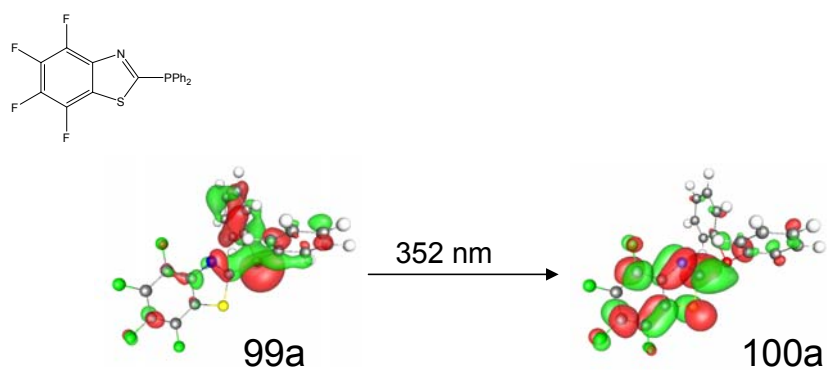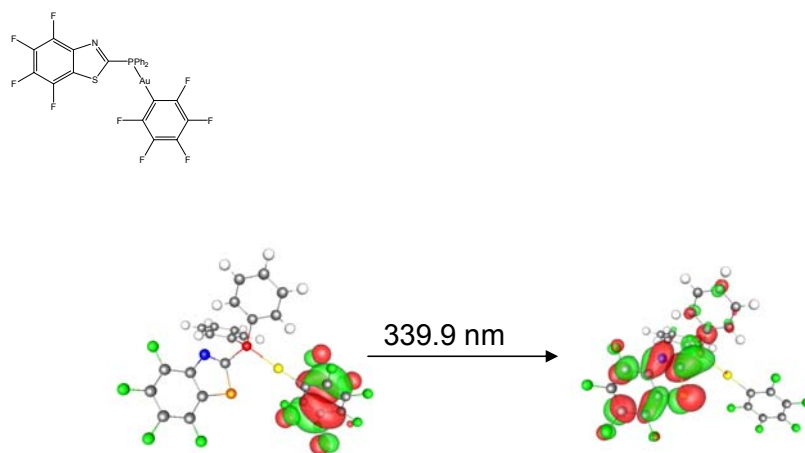

**Figure S5.** Absorption spectrum (black) of **1** in  $5 \cdot 10^{-5}$  M  $\text{CH}_2\text{Cl}_2$  solution, first few theoretical singlet excitations of model **1a** (blue) and experimental excitation spectrum of **1** (red) in solid state at room temperature.

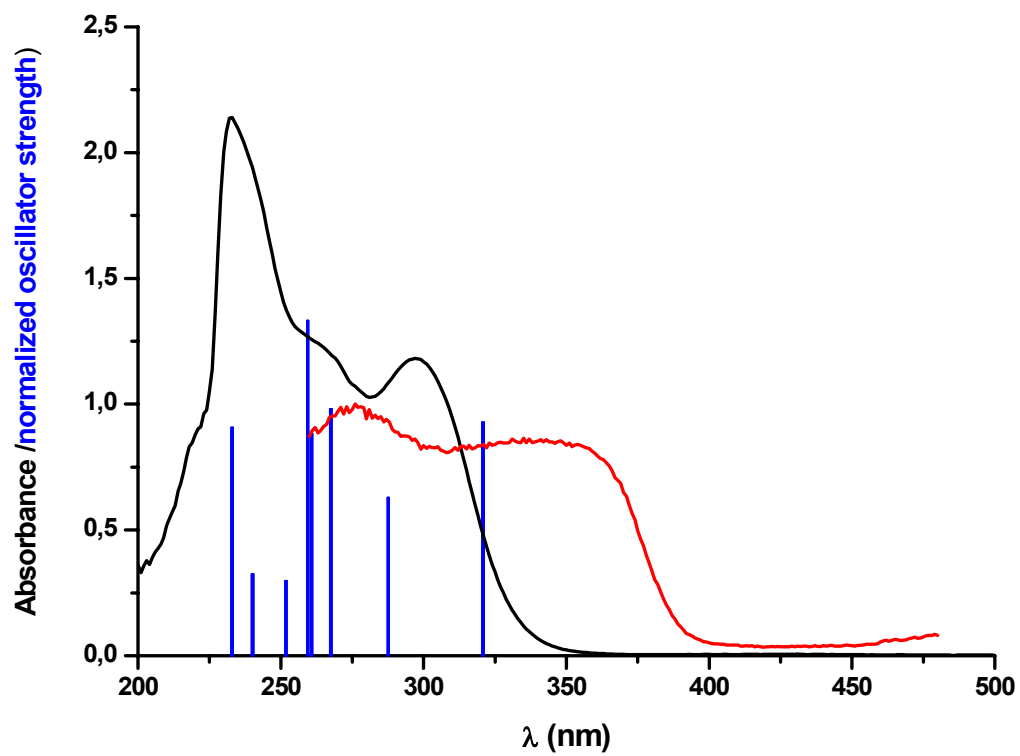



|      |       |       |       |       |       |       |       |       |       |       |
|------|-------|-------|-------|-------|-------|-------|-------|-------|-------|-------|
| 17 c | 0.000 | 0.012 | 0.001 | 0.001 | 0.000 | 0.000 | 0.000 | 0.001 | 0.000 | 0.000 |
| 18 c | 0.000 | 0.018 | 0.002 | 0.008 |       |       |       |       |       |       |
| 20 c | 0.000 | 0.032 | 0.001 | 0.008 |       |       |       |       |       |       |
| 21 h | 0.002 |       |       |       |       |       |       |       |       |       |
| 22 c | 0.000 | 0.095 | 0.003 | 0.018 |       |       |       |       |       |       |
| 23 h | 0.001 |       |       |       |       |       |       |       |       |       |
| 26 c | 0.000 | 0.001 | 0.000 | 0.000 | 0.001 | 0.000 | 0.001 | 0.000 | 0.000 | 0.000 |
| 27 c | 0.000 | 0.070 | 0.089 | 0.029 |       |       |       |       |       |       |
| 28 c | 0.000 | 0.071 | 0.084 | 0.018 |       |       |       |       |       |       |
| 29 c | 0.000 | 0.073 | 0.064 | 0.028 |       |       |       |       |       |       |
| 31 c | 0.000 | 0.080 | 0.074 | 0.036 |       |       |       |       |       |       |
| 33 c | 0.000 | 0.000 | 0.000 | 0.000 | 0.001 | 0.000 | 0.000 | 0.000 | 0.000 | 0.001 |

Contributions from MO no. 96      -0.2641

brutto population

|      |        |       |       |       |       |       |       |       |       |       |
|------|--------|-------|-------|-------|-------|-------|-------|-------|-------|-------|
| 1 c  | 0.002  | 0.004 | 0.106 | 0.011 |       |       |       |       |       |       |
| 2 c  | 0.000  | 0.001 | 0.087 | 0.011 |       |       |       |       |       |       |
| 3 c  | 0.000  | 0.000 | 0.009 | 0.002 | 0.000 | 0.000 | 0.000 | 0.002 | 0.000 | 0.000 |
| 4 c  | 0.000  | 0.001 | 0.142 | 0.017 | 0.000 | 0.000 | 0.000 | 0.000 | 0.000 | 0.001 |
| 5 c  | 0.000  | 0.000 | 0.081 | 0.010 | 0.000 | 0.000 | 0.000 | 0.000 | 0.000 | 0.001 |
| 6 c  | 0.000  | 0.000 | 0.006 | 0.001 | 0.000 | 0.000 | 0.000 | 0.002 | 0.000 | 0.000 |
| 7 c  | 0.000  | 0.000 | 0.133 | 0.018 |       |       |       |       |       |       |
| 8 f  | 0.000  | 0.000 | 0.003 | 0.000 |       |       |       |       |       |       |
| 9 f  | 0.000  | 0.000 | 0.050 | 0.006 |       |       |       |       |       |       |
| 10 f | 0.000  | 0.000 | 0.027 | 0.003 |       |       |       |       |       |       |
| 11 f | 0.000  | 0.000 | 0.002 | 0.000 |       |       |       |       |       |       |
| 12 n | 0.000  | 0.001 | 0.001 | 0.000 | 0.000 | 0.000 | 0.000 | 0.001 | 0.000 | 0.000 |
| 13 s | 0.000  | 0.000 | 0.070 | 0.006 | 0.000 | 0.000 | 0.000 | 0.003 | 0.000 | 0.000 |
| 14 p | -0.001 | 0.000 | 0.001 | 0.013 | 0.000 | 0.001 | 0.000 | 0.004 | 0.000 | 0.000 |
| 15 c | 0.000  | 0.004 | 0.002 | 0.003 |       |       |       |       |       |       |
| 16 c | 0.001  | 0.016 | 0.006 | 0.001 |       |       |       |       |       |       |
| 17 c | 0.000  | 0.036 | 0.000 | 0.011 |       |       |       |       |       |       |
| 18 c | 0.000  | 0.041 | 0.000 | 0.006 |       |       |       |       |       |       |
| 19 h | 0.002  |       |       |       |       |       |       |       |       |       |
| 20 c | 0.000  | 0.011 | 0.001 | 0.002 |       |       |       |       |       |       |
| 22 c | 0.000  | 0.007 | 0.001 | 0.001 |       |       |       |       |       |       |
| 26 c | 0.001  | 0.034 | 0.004 | 0.015 | 0.001 | 0.000 | 0.000 | 0.000 | 0.000 | 0.001 |
| 27 c | 0.000  | 0.060 | 0.042 | 0.021 | 0.000 | 0.001 | 0.000 | 0.000 | 0.001 | 0.000 |
| 28 c | 0.000  | 0.128 | 0.140 | 0.048 |       |       |       |       |       |       |
| 29 c | 0.000  | 0.122 | 0.154 | 0.043 |       |       |       |       |       |       |
| 31 c | 0.000  | 0.056 | 0.054 | 0.022 | 0.001 | 0.001 | 0.000 | 0.000 | 0.000 | 0.000 |
| 33 c | 0.000  | 0.018 | 0.018 | 0.007 | 0.001 | 0.000 | 0.001 | 0.000 | 0.000 | 0.001 |

Contributions from MO no. 97      -0.2587

brutto population

|     |       |       |       |       |  |  |  |  |  |  |
|-----|-------|-------|-------|-------|--|--|--|--|--|--|
| 1 c | 0.000 | 0.000 | 0.006 | 0.001 |  |  |  |  |  |  |
| 2 c | 0.000 | 0.000 | 0.004 | 0.001 |  |  |  |  |  |  |
| 3 c | 0.000 | 0.000 | 0.004 | 0.001 |  |  |  |  |  |  |
| 4 c | 0.000 | 0.000 | 0.017 | 0.002 |  |  |  |  |  |  |



|      |       |       |       |       |       |       |       |       |       |       |
|------|-------|-------|-------|-------|-------|-------|-------|-------|-------|-------|
| 5 c  | 0.000 | 0.000 | 0.003 | 0.000 |       |       |       |       |       |       |
| 6 c  | 0.000 | 0.000 | 0.005 | 0.001 |       |       |       |       |       |       |
| 7 c  | 0.000 | 0.000 | 0.015 | 0.001 |       |       |       |       |       |       |
| 8 f  | 0.000 | 0.000 | 0.001 | 0.000 |       |       |       |       |       |       |
| 9 f  | 0.000 | 0.000 | 0.006 | 0.001 |       |       |       |       |       |       |
| 10 f | 0.000 | 0.000 | 0.001 | 0.000 |       |       |       |       |       |       |
| 11 f | 0.000 | 0.000 | 0.002 | 0.000 |       |       |       |       |       |       |
| 12 n | 0.000 | 0.000 | 0.000 | 0.001 |       |       |       |       |       |       |
| 13 s | 0.000 | 0.000 | 0.014 | 0.003 |       |       |       |       |       |       |
| 15 c | 0.000 | 0.000 | 0.001 | 0.000 | 0.001 | 0.000 | 0.001 | 0.001 | 0.002 | 0.000 |
| 16 c | 0.000 | 0.368 | 0.006 | 0.075 | 0.000 | 0.000 | 0.000 | 0.001 | 0.000 | 0.000 |
| 17 c | 0.000 | 0.373 | 0.008 | 0.083 | 0.000 | 0.000 | 0.000 | 0.001 | 0.000 | 0.000 |
| 18 c | 0.000 | 0.383 | 0.010 | 0.077 | 0.000 | 0.000 | 0.000 | 0.001 | 0.000 | 0.000 |
| 20 c | 0.000 | 0.355 | 0.008 | 0.076 | 0.000 | 0.000 | 0.000 | 0.001 | 0.000 | 0.000 |
| 22 c | 0.000 | 0.000 | 0.000 | 0.000 | 0.001 | 0.000 | 0.001 | 0.001 | 0.002 | 0.000 |
| 27 c | 0.000 | 0.007 | 0.008 | 0.003 |       |       |       |       |       |       |
| 28 c | 0.000 | 0.003 | 0.005 | 0.002 |       |       |       |       |       |       |
| 29 c | 0.000 | 0.005 | 0.006 | 0.002 |       |       |       |       |       |       |
| 31 c | 0.000 | 0.009 | 0.008 | 0.003 |       |       |       |       |       |       |

Contributions from MO no. 98 -0.2478

brutto population

|      |       |       |       |       |       |       |       |       |       |       |
|------|-------|-------|-------|-------|-------|-------|-------|-------|-------|-------|
| 1 c  | 0.000 | 0.001 | 0.076 | 0.011 | 0.000 | 0.000 | 0.000 | 0.000 | 0.000 | 0.002 |
| 2 c  | 0.000 | 0.000 | 0.075 | 0.009 | 0.000 | 0.000 | 0.000 | 0.003 | 0.000 | 0.001 |
| 3 c  | 0.000 | 0.002 | 0.330 | 0.044 | 0.000 | 0.001 | 0.000 | 0.000 | 0.000 | 0.001 |
| 4 c  | 0.000 | 0.000 | 0.062 | 0.007 | 0.000 | 0.000 | 0.000 | 0.004 | 0.001 | 0.000 |
| 5 c  | 0.000 | 0.001 | 0.173 | 0.022 | 0.000 | 0.000 | 0.001 | 0.002 | 0.000 | 0.002 |
| 6 c  | 0.000 | 0.002 | 0.320 | 0.038 | 0.000 | 0.001 | 0.001 | 0.000 | 0.000 | 0.002 |
| 7 c  | 0.000 | 0.000 | 0.002 | 0.000 | 0.000 | 0.000 | 0.000 | 0.004 | 0.001 | 0.000 |
| 8 f  | 0.000 | 0.000 | 0.102 | 0.013 |       |       |       |       |       |       |
| 9 f  | 0.000 | 0.000 | 0.018 | 0.002 |       |       |       |       |       |       |
| 10 f | 0.000 | 0.000 | 0.050 | 0.006 |       |       |       |       |       |       |
| 11 f | 0.000 | 0.001 | 0.088 | 0.011 |       |       |       |       |       |       |
| 12 n | 0.000 | 0.000 | 0.133 | 0.016 | 0.000 | 0.000 | 0.000 | 0.000 | 0.000 | 0.001 |
| 13 s | 0.000 | 0.001 | 0.257 | 0.028 |       |       |       |       |       |       |
| 14 p | 0.002 | 0.000 | 0.001 | 0.021 | 0.000 | 0.000 | 0.000 | 0.003 | 0.000 | 0.000 |
| 15 c | 0.001 | 0.004 | 0.003 | 0.000 |       |       |       |       |       |       |
| 16 c | 0.000 | 0.001 | 0.000 | 0.000 |       |       |       |       |       |       |
| 17 c | 0.000 | 0.004 | 0.000 | 0.001 |       |       |       |       |       |       |
| 18 c | 0.000 | 0.003 | 0.001 | 0.002 |       |       |       |       |       |       |
| 20 c | 0.000 | 0.001 | 0.000 | 0.000 |       |       |       |       |       |       |
| 22 c | 0.000 | 0.001 | 0.000 | 0.000 |       |       |       |       |       |       |
| 27 c | 0.000 | 0.002 | 0.000 | 0.000 |       |       |       |       |       |       |
| 28 c | 0.000 | 0.002 | 0.000 | 0.000 |       |       |       |       |       |       |
| 29 c | 0.000 | 0.000 | 0.002 | 0.000 |       |       |       |       |       |       |
| 31 c | 0.000 | 0.001 | 0.002 | 0.000 |       |       |       |       |       |       |

Contributions from MO no. 99 -0.2038



**Table S1.** Population analysis (contribution from the atoms to the occupied orbitals) for model **3a**. Atoms with labels 9,10,13,14,18-21,24,26,27,29,30 belongs the C<sub>6</sub>F<sub>4</sub>(CNS) part of the molecule. Atom 25 is P, 33 is Au and 38-48 are C<sub>6</sub>F<sub>5</sub>.

Contributions from MO no. 142 -0.2839

brutto population

|       |       |       |       |       |       |       |       |       |       |       |
|-------|-------|-------|-------|-------|-------|-------|-------|-------|-------|-------|
| 3 c   | 0.000 | 0.001 | 0.064 | 0.037 | 0.000 | 0.000 | 0.000 | 0.002 | 0.001 | 0.000 |
| 4 c   | 0.000 | 0.001 | 0.038 | 0.024 | 0.000 | 0.001 | 0.001 | 0.000 | 0.000 | 0.000 |
| 6 c   | 0.000 | 0.003 | 0.236 | 0.098 |       |       |       |       |       |       |
| 7 c   | 0.000 | 0.003 | 0.217 | 0.116 |       |       |       |       |       |       |
| 10 f  | 0.000 | 0.000 | 0.000 | 0.036 |       |       |       |       |       |       |
| 11 c  | 0.000 | 0.001 | 0.047 | 0.038 | 0.000 | 0.001 | 0.001 | 0.000 | 0.000 | 0.000 |
| 12 c  | 0.000 | 0.001 | 0.046 | 0.054 | 0.000 | 0.000 | 0.000 | 0.002 | 0.001 | 0.000 |
| 13 c  | 0.000 | 0.000 | 0.000 | 0.000 | 0.000 | 0.000 | 0.000 | 0.000 | 0.001 | 0.001 |
| 14 c  | 0.000 | 0.000 | 0.000 | 0.093 | 0.000 | 0.000 | 0.000 | 0.000 | 0.001 | 0.000 |
| 15 h  | 0.002 |       |       |       |       |       |       |       |       |       |
| 18 n  | 0.001 | 0.000 | 0.001 | 0.000 |       |       |       |       |       |       |
| 19 c  | 0.000 | 0.001 | 0.000 | 0.108 |       |       |       |       |       |       |
| 20 f  | 0.000 | 0.000 | 0.000 | 0.046 |       |       |       |       |       |       |
| 21 c  | 0.000 | 0.000 | 0.000 | 0.121 | 0.000 | 0.000 | 0.000 | 0.000 | 0.000 | 0.001 |
| 22 c  | 0.000 | 0.012 | 0.004 | 0.003 |       |       |       |       |       |       |
| 23 c  | 0.000 | 0.013 | 0.053 | 0.009 |       |       |       |       |       |       |
| 24 c  | 0.001 | 0.000 | 0.001 | 0.086 |       |       |       |       |       |       |
| 25 p  | 0.007 | 0.012 | 0.004 | 0.002 | 0.000 | 0.000 | 0.000 | 0.000 | 0.000 | 0.008 |
| 26 c  | 0.000 | 0.000 | 0.000 | 0.076 |       |       |       |       |       |       |
| 27 c  | 0.000 | 0.000 | 0.000 | 0.008 | 0.000 | 0.000 | 0.000 | 0.000 | 0.001 | 0.000 |
| 28 c  | 0.003 | 0.014 | 0.002 | 0.041 |       |       |       |       |       |       |
| 29 s  | 0.000 | 0.000 | 0.000 | 0.010 | 0.000 | 0.000 | 0.000 | 0.000 | 0.001 | 0.002 |
| 30 f  | 0.000 | 0.000 | 0.000 | 0.002 |       |       |       |       |       |       |
| 31 c  | 0.000 | 0.007 | 0.017 | 0.005 |       |       |       |       |       |       |
| 33 au | 0.014 | 0.001 | 0.000 | 0.000 | 0.001 | 0.006 | 0.002 | 0.003 | 0.002 | 0.006 |
| 34 c  | 0.000 | 0.021 | 0.048 | 0.007 |       |       |       |       |       |       |
| 35 c  | 0.000 | 0.002 | 0.003 | 0.005 |       |       |       |       |       |       |
| 38 c  | 0.000 | 0.004 | 0.002 | 0.000 |       |       |       |       |       |       |

Contributions from MO no. 143 -0.2808

brutto population

|      |       |       |       |       |       |       |       |       |       |       |
|------|-------|-------|-------|-------|-------|-------|-------|-------|-------|-------|
| 3 c  | 0.000 | 0.001 | 0.037 | 0.020 | 0.000 | 0.000 | 0.000 | 0.002 | 0.001 | 0.000 |
| 4 c  | 0.000 | 0.004 | 0.287 | 0.152 |       |       |       |       |       |       |
| 6 c  | 0.000 | 0.001 | 0.104 | 0.071 | 0.000 | 0.001 | 0.001 | 0.000 | 0.000 | 0.000 |
| 7 c  | 0.000 | 0.004 | 0.115 | 0.064 | 0.000 | 0.001 | 0.001 | 0.000 | 0.000 | 0.000 |
| 10 f | 0.000 | 0.000 | 0.000 | 0.026 |       |       |       |       |       |       |
| 11 c | 0.000 | 0.003 | 0.298 | 0.140 |       |       |       |       |       |       |
| 12 c | 0.000 | 0.001 | 0.025 | 0.034 | 0.000 | 0.000 | 0.000 | 0.002 | 0.002 | 0.000 |
| 13 c | 0.000 | 0.000 | 0.000 | 0.000 | 0.000 | 0.000 | 0.000 | 0.000 | 0.001 | 0.000 |
| 14 c | 0.000 | 0.000 | 0.000 | 0.070 |       |       |       |       |       |       |
| 15 h | 0.001 |       |       |       |       |       |       |       |       |       |
| 18 n | 0.000 | 0.000 | 0.000 | 0.001 |       |       |       |       |       |       |

|       |       |       |       |       |       |       |       |       |       |       |
|-------|-------|-------|-------|-------|-------|-------|-------|-------|-------|-------|
| 19 c  | 0.000 | 0.000 | 0.000 | 0.071 |       |       |       |       |       |       |
| 20 f  | 0.000 | 0.000 | 0.000 | 0.029 |       |       |       |       |       |       |
| 21 c  | 0.000 | 0.000 | 0.000 | 0.078 |       |       |       |       |       |       |
| 22 c  | 0.000 | 0.001 | 0.006 | 0.000 |       |       |       |       |       |       |
| 23 c  | 0.000 | 0.002 | 0.011 | 0.000 |       |       |       |       |       |       |
| 24 c  | 0.000 | 0.000 | 0.000 | 0.062 |       |       |       |       |       |       |
| 25 p  | 0.004 | 0.021 | 0.004 | 0.002 | 0.000 | 0.000 | 0.000 | 0.000 | 0.000 | 0.006 |
| 26 c  | 0.000 | 0.000 | 0.000 | 0.063 |       |       |       |       |       |       |
| 27 c  | 0.000 | 0.000 | 0.000 | 0.002 | 0.000 | 0.000 | 0.000 | 0.000 | 0.001 | 0.000 |
| 28 c  | 0.002 | 0.010 | 0.000 | 0.037 |       |       |       |       |       |       |
| 29 s  | 0.000 | 0.000 | 0.000 | 0.012 | 0.000 | 0.000 | 0.000 | 0.000 | 0.001 | 0.001 |
| 31 c  | 0.000 | 0.005 | 0.016 | 0.007 |       |       |       |       |       |       |
| 33 au | 0.001 | 0.002 | 0.000 | 0.004 | 0.001 | 0.000 | 0.003 | 0.000 | 0.004 | 0.000 |
| 34 c  | 0.000 | 0.003 | 0.008 | 0.001 |       |       |       |       |       |       |
| 35 c  | 0.000 | 0.000 | 0.005 | 0.000 |       |       |       |       |       |       |
| 38 c  | 0.002 | 0.014 | 0.005 | 0.000 |       |       |       |       |       |       |

Contributions from MO no. 144      -0.2794

brutto population

|       |       |       |       |       |       |       |       |       |       |       |
|-------|-------|-------|-------|-------|-------|-------|-------|-------|-------|-------|
| 3 c   | 0.000 | 0.000 | 0.003 | 0.001 |       |       |       |       |       |       |
| 4 c   | 0.000 | 0.000 | 0.003 | 0.001 |       |       |       |       |       |       |
| 6 c   | 0.000 | 0.000 | 0.012 | 0.005 |       |       |       |       |       |       |
| 7 c   | 0.000 | 0.001 | 0.010 | 0.007 |       |       |       |       |       |       |
| 10 f  | 0.000 | 0.000 | 0.000 | 0.008 |       |       |       |       |       |       |
| 11 c  | 0.000 | 0.000 | 0.003 | 0.001 |       |       |       |       |       |       |
| 12 c  | 0.000 | 0.000 | 0.003 | 0.002 |       |       |       |       |       |       |
| 14 c  | 0.000 | 0.000 | 0.000 | 0.022 |       |       |       |       |       |       |
| 18 n  | 0.003 | 0.001 | 0.008 | 0.001 |       |       |       |       |       |       |
| 19 c  | 0.000 | 0.000 | 0.001 | 0.036 |       |       |       |       |       |       |
| 20 f  | 0.000 | 0.000 | 0.000 | 0.013 |       |       |       |       |       |       |
| 21 c  | 0.000 | 0.000 | 0.000 | 0.036 |       |       |       |       |       |       |
| 22 c  | 0.000 | 0.079 | 0.229 | 0.070 | 0.000 | 0.001 | 0.000 | 0.000 | 0.000 | 0.000 |
| 23 c  | 0.000 | 0.104 | 0.283 | 0.094 | 0.000 | 0.001 | 0.000 | 0.000 | 0.000 | 0.000 |
| 24 c  | 0.001 | 0.001 | 0.001 | 0.022 |       |       |       |       |       |       |
| 25 p  | 0.000 | 0.001 | 0.001 | 0.000 | 0.000 | 0.000 | 0.000 | 0.000 | 0.000 | 0.000 |
| 26 c  | 0.000 | 0.000 | 0.000 | 0.020 |       |       |       |       |       |       |
| 27 c  | 0.000 | 0.000 | 0.000 | 0.003 |       |       |       |       |       |       |
| 28 c  | 0.000 | 0.001 | 0.008 | 0.000 | 0.002 | 0.001 | 0.000 | 0.002 | 0.000 | 0.001 |
| 29 s  | 0.000 | 0.001 | 0.002 | 0.004 |       |       |       |       |       |       |
| 30 f  | 0.000 | 0.000 | 0.000 | 0.001 |       |       |       |       |       |       |
| 31 c  | 0.000 | 0.001 | 0.004 | 0.001 | 0.002 | 0.001 | 0.000 | 0.002 | 0.000 | 0.001 |
| 33 au | 0.001 | 0.001 | 0.000 | 0.000 | 0.000 | 0.001 | 0.002 | 0.000 | 0.000 | 0.000 |
| 34 c  | 0.000 | 0.102 | 0.288 | 0.102 | 0.000 | 0.000 | 0.000 | 0.000 | 0.000 | 0.000 |
| 35 c  | 0.000 | 0.077 | 0.226 | 0.063 | 0.000 | 0.001 | 0.000 | 0.000 | 0.000 | 0.000 |

Contributions from MO no. 145      -0.2728

brutto population

|     |       |       |       |       |  |  |  |  |  |  |
|-----|-------|-------|-------|-------|--|--|--|--|--|--|
| 3 c | 0.000 | 0.002 | 0.110 | 0.064 |  |  |  |  |  |  |
|-----|-------|-------|-------|-------|--|--|--|--|--|--|

|       |       |       |       |       |       |       |       |       |       |       |
|-------|-------|-------|-------|-------|-------|-------|-------|-------|-------|-------|
| 4 c   | 0.000 | 0.000 | 0.019 | 0.011 | 0.000 | 0.001 | 0.000 | 0.000 | 0.000 | 0.000 |
| 6 c   | 0.000 | 0.000 | 0.032 | 0.016 | 0.000 | 0.000 | 0.000 | 0.001 | 0.000 | 0.000 |
| 7 c   | 0.000 | 0.000 | 0.035 | 0.027 | 0.000 | 0.000 | 0.000 | 0.001 | 0.000 | 0.000 |
| 9 f   | 0.000 | 0.000 | 0.000 | 0.001 |       |       |       |       |       |       |
| 10 f  | 0.000 | 0.000 | 0.000 | 0.049 |       |       |       |       |       |       |
| 11 c  | 0.000 | 0.000 | 0.026 | 0.015 | 0.000 | 0.001 | 0.000 | 0.000 | 0.000 | 0.000 |
| 12 c  | 0.001 | 0.003 | 0.138 | 0.040 |       |       |       |       |       |       |
| 13 c  | 0.000 | 0.000 | 0.000 | 0.005 | 0.000 | 0.000 | 0.000 | 0.000 | 0.001 | 0.001 |
| 14 c  | 0.000 | 0.000 | 0.000 | 0.140 | 0.000 | 0.000 | 0.000 | 0.000 | 0.001 | 0.000 |
| 18 n  | 0.000 | 0.000 | 0.000 | 0.004 | 0.000 | 0.000 | 0.000 | 0.000 | 0.001 | 0.000 |
| 19 c  | 0.000 | 0.000 | 0.000 | 0.102 |       |       |       |       |       |       |
| 20 f  | 0.000 | 0.000 | 0.000 | 0.033 |       |       |       |       |       |       |
| 21 c  | 0.000 | 0.000 | 0.000 | 0.096 | 0.000 | 0.000 | 0.000 | 0.000 | 0.000 | 0.001 |
| 22 c  | 0.000 | 0.015 | 0.082 | 0.021 |       |       |       |       |       |       |
| 23 c  | 0.000 | 0.000 | 0.003 | 0.000 | 0.000 | 0.000 | 0.001 | 0.000 | 0.000 | 0.001 |
| 24 c  | 0.001 | 0.003 | 0.002 | 0.096 |       |       |       |       |       |       |
| 25 p  | 0.013 | 0.024 | 0.006 | 0.000 | 0.001 | 0.000 | 0.000 | 0.001 | 0.000 | 0.000 |
| 26 c  | 0.000 | 0.001 | 0.000 | 0.139 |       |       |       |       |       |       |
| 27 c  | 0.000 | 0.000 | 0.000 | 0.002 | 0.000 | 0.000 | 0.000 | 0.000 | 0.001 | 0.001 |
| 28 c  | 0.001 | 0.046 | 0.075 | 0.057 |       |       |       |       |       |       |
| 29 s  | 0.000 | 0.000 | 0.000 | 0.067 | 0.000 | 0.000 | 0.000 | 0.000 | 0.001 | 0.003 |
| 31 c  | 0.000 | 0.037 | 0.102 | 0.030 |       |       |       |       |       |       |
| 33 au | 0.004 | 0.002 | 0.000 | 0.000 | 0.000 | 0.000 | 0.001 | 0.001 | 0.000 | 0.001 |
| 34 c  | 0.000 | 0.002 | 0.005 | 0.001 | 0.000 | 0.000 | 0.001 | 0.000 | 0.000 | 0.001 |
| 35 c  | 0.000 | 0.022 | 0.070 | 0.020 |       |       |       |       |       |       |
| 38 c  | 0.003 | 0.023 | 0.007 | 0.000 |       |       |       |       |       |       |
| 41 c  | 0.000 | 0.001 | 0.000 | 0.000 |       |       |       |       |       |       |
| 42 c  | 0.000 | 0.001 | 0.000 | 0.000 |       |       |       |       |       |       |

Contributions from MO no. 146      -0.2680

brutto population

|       |        |        |       |       |        |       |       |       |       |       |
|-------|--------|--------|-------|-------|--------|-------|-------|-------|-------|-------|
| 4 c   | 0.000  | 0.000  | 0.003 | 0.001 |        |       |       |       |       |       |
| 6 c   | 0.000  | 0.000  | 0.000 | 0.002 |        |       |       |       |       |       |
| 7 c   | 0.000  | 0.000  | 0.000 | 0.001 |        |       |       |       |       |       |
| 11 c  | 0.000  | 0.003  | 0.003 | 0.001 |        |       |       |       |       |       |
| 12 c  | 0.000  | 0.000  | 0.000 | 0.001 |        |       |       |       |       |       |
| 13 c  | 0.000  | 0.000  | 0.000 | 0.001 |        |       |       |       |       |       |
| 16 h  | 0.002  |        |       |       |        |       |       |       |       |       |
| 19 c  | 0.000  | 0.000  | 0.000 | 0.001 |        |       |       |       |       |       |
| 21 c  | 0.000  | 0.000  | 0.000 | 0.001 |        |       |       |       |       |       |
| 22 c  | 0.000  | 0.001  | 0.000 | 0.000 |        |       |       |       |       |       |
| 24 c  | -0.001 | 0.000  | 0.000 | 0.001 |        |       |       |       |       |       |
| 25 p  | -0.002 | -0.005 | 0.000 | 0.000 | 0.001  | 0.000 | 0.000 | 0.001 | 0.000 | 0.000 |
| 26 c  | 0.000  | 0.004  | 0.000 | 0.000 |        |       |       |       |       |       |
| 28 c  | 0.000  | 0.000  | 0.002 | 0.000 |        |       |       |       |       |       |
| 29 s  | 0.001  | 0.001  | 0.002 | 0.000 |        |       |       |       |       |       |
| 31 c  | 0.000  | 0.000  | 0.002 | 0.000 |        |       |       |       |       |       |
| 33 au | 0.775  | 0.005  | 0.002 | 0.000 | -0.033 | 0.068 | 0.289 | 0.234 | 0.000 | 0.001 |
| 34 c  | 0.000  | 0.005  | 0.001 | 0.001 |        |       |       |       |       |       |

35 c 0.000 0.000 0.000 0.001  
 36 h 0.003  
 38 c 0.111 0.310 0.071 0.000  
 39 c -0.001 0.003 0.000 0.017 0.001 0.000 0.002 0.000 0.001 0.001  
 40 c -0.001 0.002 0.003 0.016 0.000 0.000 0.002 0.001 0.001 0.000  
 41 c 0.006 0.005 0.002 0.002  
 42 c 0.006 0.006 0.001 0.003  
 44 f 0.000 0.000 0.001 0.009  
 45 f 0.000 0.008 0.002 0.000  
 47 f 0.000 0.008 0.001 0.000  
 48 f 0.000 0.001 0.000 0.009

Contributions from MO no. 147 -0.2622

brutto population

3 c 0.000 0.000 0.001 0.001  
 6 c 0.000 0.000 0.001 0.001  
 7 c 0.000 0.000 0.003 0.001  
 9 f 0.000 0.000 0.000 0.120  
 10 f 0.000 0.000 0.000 0.039  
 12 c 0.000 0.000 0.002 0.001  
 13 c 0.000 0.001 0.000 0.386 0.000 0.000 0.000 0.000 0.000 0.003  
 14 c 0.000 0.000 0.000 0.126 0.000 0.000 0.000 0.000 0.001 0.005  
 18 n 0.000 0.000 0.000 0.137  
 19 c 0.000 0.000 0.000 0.044 0.000 0.000 0.000 0.000 0.005 0.000  
 20 f 0.000 0.000 0.000 0.039  
 21 c 0.000 0.001 0.000 0.127 0.000 0.000 0.000 0.000 0.005 0.000  
 22 c 0.000 0.002 0.005 0.001  
 24 c 0.000 0.000 0.000 0.024 0.000 0.000 0.000 0.000 0.002 0.001  
 26 c 0.000 0.000 0.000 0.030 0.000 0.000 0.000 0.000 0.002 0.003  
 27 c 0.000 0.001 0.000 0.385 0.000 0.000 0.000 0.000 0.002 0.001  
 28 c 0.000 0.002 0.004 0.002  
 29 s 0.000 0.001 0.000 0.338  
 30 f 0.000 0.000 0.000 0.114  
 31 c 0.000 0.001 0.005 0.001  
 33 au 0.001 0.000 0.000 0.002 0.000 0.000 0.000 0.000 0.002 0.001  
 35 c 0.000 0.001 0.004 0.002  
 38 c 0.000 0.001 0.001 0.000

Contributions from MO no. 148 -0.2373

brutto population

24 c 0.001 0.000 0.001 0.000  
 25 p 0.000 0.001 0.003 0.000 0.001 0.000 0.000 0.002 0.000 0.000  
 29 s 0.000 0.000 0.001 0.000  
 33 au 0.000 0.004 0.016 0.001 0.030 0.028 0.000 0.035 0.006 0.002  
 38 c 0.000 0.105 0.431 0.042 0.001 0.001 0.000 0.001 0.000 0.000  
 39 c 0.000 0.024 0.098 0.010 0.001 0.000 0.001 0.001 0.000 0.003  
 40 c 0.000 0.020 0.084 0.008 0.000 0.002 0.000 0.000 0.001 0.002  
 41 c 0.000 0.018 0.076 0.008 0.000 0.002 0.000 0.000 0.001 0.001

42 c 0.000 0.021 0.088 0.009 0.001 0.000 0.001 0.001 0.000 0.003  
43 c 0.000 0.084 0.354 0.035 0.001 0.001 0.000 0.001 0.000 0.000  
44 f 0.000 0.007 0.031 0.003  
45 f 0.000 0.007 0.031 0.003  
46 f 0.000 0.027 0.114 0.011  
47 f 0.000 0.006 0.026 0.003  
48 f 0.000 0.008 0.035 0.004
